# Supplementary material for: Is Culture Expansion Necessary in Autologous Mesenchymal Stromal Cell Therapy to Obtain Superior Results in the Management of Knee Osteoarthritis?—Meta-Analysis of Randomized Controlled Trials
Source: MDPI journal article supplement (doi:10.3390/bioengineering8120220), 2021-12-16
Supplement: s1 [file s1]

## Supplementary Materials

**Table S1.** Search strategy used in PubMed database.

| Search Topic                                                                                                             | #   | Search Terms                                                                                                                                                                                                                                                                                                                                                                                                                                                                                                                                                                                                                                                                                                                                                                                                                                     |
|--------------------------------------------------------------------------------------------------------------------------|-----|--------------------------------------------------------------------------------------------------------------------------------------------------------------------------------------------------------------------------------------------------------------------------------------------------------------------------------------------------------------------------------------------------------------------------------------------------------------------------------------------------------------------------------------------------------------------------------------------------------------------------------------------------------------------------------------------------------------------------------------------------------------------------------------------------------------------------------------------------|
| <b>Population:</b><br><i>Human subjects with knee osteoarthritis</i>                                                     | #1  | ("Osteoarthritis"[Mesh]) OR (osteoarthritis [All Fields])<br>OR (OA[All Fields])                                                                                                                                                                                                                                                                                                                                                                                                                                                                                                                                                                                                                                                                                                                                                                 |
|                                                                                                                          | #2  | ("knee joint"[MeSH]) OR ("knee joint"[All Fields]) OR ("knee"[All Fields])                                                                                                                                                                                                                                                                                                                                                                                                                                                                                                                                                                                                                                                                                                                                                                       |
|                                                                                                                          | #3  | #1 AND #2                                                                                                                                                                                                                                                                                                                                                                                                                                                                                                                                                                                                                                                                                                                                                                                                                                        |
| <b>Intervention:</b><br><i>Cellular therapy, Injection, Culture Expanded BM-MSC, AD-MSC, Bone marrow, Adipose tissue</i> | #4  | ("stem cell transplantation"[Mesh]) OR ("cell- and tissue-based therapy"[Mesh]) OR ("mesenchymal stem cells"[Mesh]) OR ("culture expanded"[All Fields]) OR ("stem cell therapy"[All Fields]) OR ("cellular therapy"[All Fields]) OR ("stem cell therapy"[All Fields]) OR ("mesenchymal stem cell therapy"[All Fields])                                                                                                                                                                                                                                                                                                                                                                                                                                                                                                                           |
|                                                                                                                          | #5  | ("bone marrow"[Mesh]) OR ("adipose tissue"[Mesh]) OR ("bone marrow transplantation"[Mesh]) OR ("bone marrow"[All Fields]) OR ("adipose tissue"[All Fields]) OR ("bone marrow transplantation"[All Fields])                                                                                                                                                                                                                                                                                                                                                                                                                                                                                                                                                                                                                                       |
|                                                                                                                          | #6  | #4 AND #5                                                                                                                                                                                                                                                                                                                                                                                                                                                                                                                                                                                                                                                                                                                                                                                                                                        |
|                                                                                                                          | #7  | #3 AND #6                                                                                                                                                                                                                                                                                                                                                                                                                                                                                                                                                                                                                                                                                                                                                                                                                                        |
| <b>Study design:</b><br><i>RCTs</i>                                                                                      | #8  | ("clinical trial"[All Fields] OR "clinical trials as topic"[MeSH Terms] OR "clinical trials"[All Fields] OR "randomized controlled trial"[All Fields] OR "randomized controlled trials as topic"[MeSH Terms] OR "randomized controlled trial"[pt] OR "controlled clinical trial"[pt] OR "randomized"[tiab] OR "randomly"[tiab] OR "trial"[ti] OR "randomised controlled trial"[All Fields] OR "randomized controlled trial"[pt] "prospective studies"[MeSH Terms] OR "prospective studies"[All Fields])                                                                                                                                                                                                                                                                                                                                          |
|                                                                                                                          | #9  | #7 AND #8                                                                                                                                                                                                                                                                                                                                                                                                                                                                                                                                                                                                                                                                                                                                                                                                                                        |
|                                                                                                                          | #10 | ("retrospective studies"[MeSH Terms] OR "retrospective studies"[All Fields] OR "retrospective study"[All Fields] OR "biography"[Publication Type] OR "comment"[Publication Type] OR "directory"[Publication Type] OR "editorial"[Publication Type] OR "festschrift"[Publication Type] OR "interview"[Publication Type] OR "lecture"[Publication Type] OR "legal case"[Publication Type] OR "legislation"[Publication Type] OR "letter"[Publication Type] OR "news"[Publication Type] OR "newspaper article"[Publication Type] OR "patient education handout"[Publication Type] OR "popular work"[Publication Type] OR "congress"[Publication Type] OR "consensus development conference"[Publication Type] OR "consensus development conference, nih"[Publication Type] OR "practice guideline"[Publication Type] OR "Review"[Publication Type]) |
|                                                                                                                          | #11 | #9 NOT #10                                                                                                                                                                                                                                                                                                                                                                                                                                                                                                                                                                                                                                                                                                                                                                                                                                       |
